# Supplementary material for: Red Cell Distribution Width and Other Red Blood Cell Parameters in Patients with Cancer: Association with Risk of Venous Thromboembolism and Mortality
Source: PubMed Central journal article supplement (PMC4210186; doi:10.1371/journal.pone.0111440), 2014-10-27
Supplement: pone.0111440.s001.pdf [file pone.0111440.s001.pdf]

Table S1. Characteristics of patients with RDW>16% and below. Continuous variables are given by the mean and interquartile range. P-values for differences between groups are given.

|                                   | <b>RDW &gt; 16%</b><br><b>(n=188)</b> | <b>RDW ≤ 16%</b><br><b>(n=1652)</b> | <b><i>p-value</i></b> |
|-----------------------------------|---------------------------------------|-------------------------------------|-----------------------|
| Hemoglobin, g/dl                  | 10.5 (9.3-12.0)                       | 13.2 (12.1-14.2)                    | <0.001                |
| Erythrocytes, T/l                 | 4.05 (3.40-4.45)                      | 4.40 (4.10-4.70)                    | <0.001                |
| Hematocrit, %                     | 32.8 (29.8-36.8)                      | 39.3 (36.3-41.7)                    | <0.001                |
| MCV, fl                           | 84.45 (77.80-90.65)                   | 88.80 (85.90-91.80)                 | <0.001                |
| MCH, pg                           | 27.4 (24.6-29.5)                      | 30.0 (28.9-31.1)                    | <0.001                |
| MCHC, g/dl                        | 32.1 (31.2-33.1)                      | 33.7 (33.1-34.4)                    | <0.001                |
| Leukocyte count, G/l              | 7.4 (5.7-10.9)                        | 7.2 (5.7-9.5)                       | 0.307                 |
| Platelet count, G/l               | 271 (177-364)                         | 246 (198-306)                       | 0.191                 |
| Use of ESA, n (%)                 | 20 (10.6)                             | 34 (2.1)                            | <0.001                |
| Iron supplementary therapy, n (%) | 12 (6.4)                              | 12 (0.7)                            | <0.001                |
| CRP, mg/dl                        | 1.45 (0.25-5.07)                      | 0.46 (0.15-1.40)                    | <0.001                |
